# Supplementary material for: Brassinosteroid Biosynthetic Gene SlCYP90B3 Alleviates Chilling Injury of Tomato (Solanum lycopersicum) Fruits during Cold Storage
Source: MDPI journal article supplement (doi:10.3390/antiox11010115), 2022-01-05
Supplement: s1 [file s1]

**Table S1** Specific primers used for qRT-PCR analysis.

| Specific primer sequences used for real-time quantitative PCR analysis. |                           |                       |
|-------------------------------------------------------------------------|---------------------------|-----------------------|
| Target gene                                                             | Primer sequence (5' - 3') | gene_name             |
| <i>SICYP90B3-F</i>                                                      | TGGAGGAGAGGCTTAAGGAA      | <i>Solyc02g085360</i> |
| <i>SICYP90B3-R</i>                                                      | GGCCAGCAAAGAGCAAACCTC     |                       |
| <i>SICPD-F</i>                                                          | CTTCTCTCCGAGCTGTTCATCTAG  | <i>Solyc06g051750</i> |
| <i>SICPD-R</i>                                                          | GAAGGAAAACAGAGAGTTCCACTC  |                       |
| <i>SICYP85A1-F</i>                                                      | TCCTGATCCATATTCGTTCAA     | <i>Solyc02g089160</i> |
| <i>SICYP85A1-R</i>                                                      | ACCAAGTTCCTTTCCAGGAC      |                       |
| <i>SICBF1-F</i>                                                         | TTCATCGTCATCGTCGTTTTCT    | <i>Solyc03g026280</i> |
| <i>SICBF1-R</i>                                                         | TCCTCTTCCTGATTCCCCTGT     |                       |
| <i>ACTIN-F</i>                                                          | CCTCAGCACATTCCAGCAG       | <i>Solyc03g078400</i> |
| <i>ACTIN-R</i>                                                          | CCACCAAACCTTCTCCATCCC     |                       |

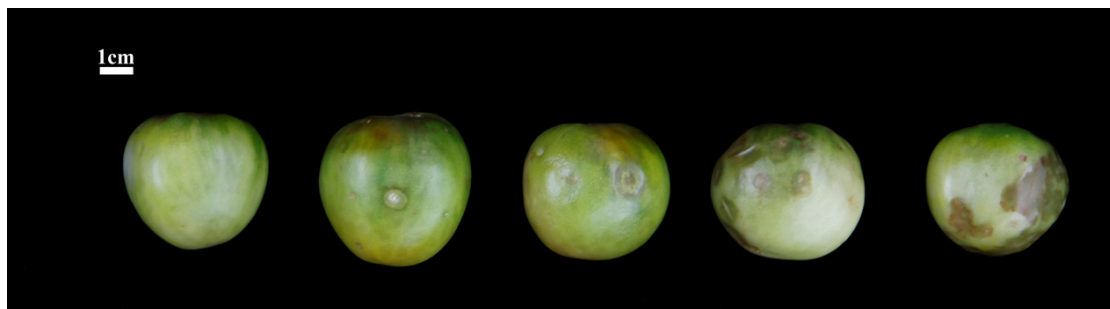

0 (no pitting)    1 (<10%)    2 (10-25%)    3 (25-50%)    4 (>50%)

**Figure S1.** Chilled pitting on the surface of postharvest tomato fruits.

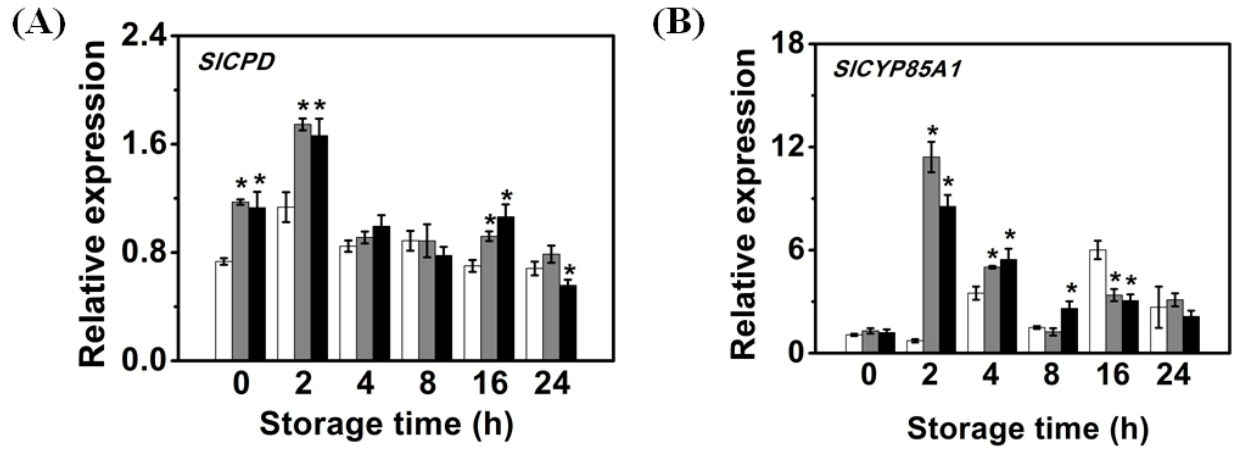

**Figure S2.** *S1CYP90B3* overexpression promoted the expression of BR biosynthetic genes during 24h of cold storage. (A) Expression levels of *S1CPD*. (B) Expression levels of *S1CYP85A1*. Each data point is means  $\pm$  SE (n=3).
